# Supplementary material for: A systematic review of concussion in rugby league
Source: HighWire-hosted journal article supplement (doi:10.1136/bjsports-2013-093102), 2014-04-10
Supplement: bjsports-2013-093102supp_table2.pdf [file bjsports-2013-093102supp_table2.pdf]

Supplementary Table 2. Studies reporting on concussion incidence

| Author (year)     | Concussion incidence                                                                                                                                                                | Injury Definition                                                                                                  | Level of Play               | Number of teams and seasons                                                              | Ranking of concussion frequency among all other injuries, rates of overall injury, and rates of concussion   |
|-------------------|-------------------------------------------------------------------------------------------------------------------------------------------------------------------------------------|--------------------------------------------------------------------------------------------------------------------|-----------------------------|------------------------------------------------------------------------------------------|--------------------------------------------------------------------------------------------------------------|
| King et al (2012) | Ball carrier 6 per 10,000 tackle events & 12 per 1,000 match hours; Tackler 4 per 10,000 tackle events & 8 per 1,000 match hours. Concussion Risk ration Ball Carrier:Tackler = 1.4 | An injury that rendered the player unavailable for selection in the next match                                     | Professional                | One team, two seasons (48 matches; 830 playing hours)                                    | Equal 4 <sup>th</sup> ; 18 concussions / 266 total injuries                                                  |
| King et al (2009) | Division 1: 12.9; Division 2: 27.2; overall 17.5.                                                                                                                                   | Injuries defined as both: transient (did not miss a game), and missed game injuries.                               | Amateur                     | Two teams, two seasons (53 matches; 951 hours)                                           | Least frequent injury category recorded                                                                      |
| Gabbett (2008)    | 4.6                                                                                                                                                                                 | Any pain or disability suffered by a player during a match that resulted in the player missing a subsequent match. | Junior                      | One team, four seasons (84 matches)                                                      | 5 <sup>th</sup> most frequent type of injury                                                                 |
| King et al (2006) | Total 6.5; Semi-Professional 10.6; Amateur 0.                                                                                                                                       | Any pain or disability suffered by a player during a match that resulted in the player missing a subsequent match. | Semi-Professional & Amateur | 20 teams, 1 'sevens' tournament (47 games)                                               | Equal 6 <sup>th</sup> ; 1 concussion / 76 total injuries                                                     |
| Gabbett (2005)    | Forwards: 5; Backs: 3; Outside Backs: 4; Halves & Hooker: 2; Backrowers: 4; Props: 6.                                                                                               | Any pain or disability suffered by a player during a match that resulted in the player missing a subsequent match. | Semi-Professional           | 156 players over two seasons                                                             | Forwards equal 5 <sup>th</sup> , 5 / 80 total injuries; Backs equal 5 <sup>th</sup> , 3 / 57 total injuries. |
| Gabbett (2005)    | Unlimited Interchange: 5.1; Limited Interchange: 3.0; Limited/Unlimited                                                                                                             | Any pain or disability suffered by a player during a match that resulted in the player missing a subsequent        | Semi-Professional           | One club, three seasons (two under Unlimited Interchange; one under Limited Interchange) | Unlimited Interchange equal 4 <sup>th</sup> , Limited Interchange equal 5 <sup>th</sup> .                    |

| Author (year)             | Concussion incidence                                                                                                                                                    | Injury Definition                                                                                                  | Level of Play     | Number of teams and seasons                                  | Ranking of concussion frequency among all other injuries, rates of overall injury, and rates of concussion                          |
|---------------------------|-------------------------------------------------------------------------------------------------------------------------------------------------------------------------|--------------------------------------------------------------------------------------------------------------------|-------------------|--------------------------------------------------------------|-------------------------------------------------------------------------------------------------------------------------------------|
|                           | Interchange RR: 0.59                                                                                                                                                    | match.                                                                                                             |                   | rules)                                                       |                                                                                                                                     |
| Gabbett et al (2005)      | 3.0                                                                                                                                                                     | Any pain or disability suffered by a player during a match that resulted in the player missing a subsequent match. | Semi-Professional | One club, four seasons                                       | 5 <sup>th</sup>                                                                                                                     |
| Gabbett (2004)            | Training injuries: Year 2001: 0; Year 2002: 1.7<br>Year 2003: 0.7                                                                                                       | Any pain or disability suffered by a player during a match that resulted in the player missing a subsequent match. | Semi-Professional | One club, three seasons                                      | 2001: 10 <sup>th</sup> ; 2002: 8 <sup>th</sup> ; 2003: 10 <sup>th</sup> .                                                           |
| Hinton-Bayre et al (2004) | 1 <sup>st</sup> Grade: 9.84; Res. Grade: 7.87;<br><br>Age-Grade: 5.90                                                                                                   | The team physician made a clinical diagnosis of concussion                                                         | Professional      | Two clubs, three seasons                                     | NR: Concussion only                                                                                                                 |
| Gissane et al (2003)      | Summer: 4.02; Winter: 3.35<br><br>Summer:Winter RR: 1.20                                                                                                                | Any pain or disability suffered by a player during a match that resulted in the player missing a subsequent match. | Professional      | One club, nine seasons (five summer and four winter seasons) | Summer: 6 <sup>th</sup><br><br>Winter: equal 4 <sup>th</sup>                                                                        |
| Gabbett (2003)            | NR graphically represented.<br><br>Match: Forward: slightly less than 40.0; Backs: slightly less than Forwards total.<br><br>Training: Forwards: less than 1; Backs: 0. | Any pain or disability suffered by a player during a match that resulted in the player missing a subsequent match. | Semi-Professional | 156 players, two seasons                                     | Match: Forwards: 7 <sup>th</sup> ; Backs: 6 <sup>th</sup> .<br><br>Training: Forwards: 11 <sup>th</sup> ; Backs: 13 <sup>th</sup> . |
| Gissane et al             | Winter: 3.35                                                                                                                                                            | A physical impairment received during a competitive match which                                                    | Professional      | One club, four seasons                                       | Winter: Equal 4 <sup>th</sup> , (8 / 72 total                                                                                       |

| Author (year)           | Concussion incidence                                   | Injury Definition                                                                                                                | Level of Play | Number of teams and seasons | Ranking of concussion frequency among all other injuries, rates of overall injury, and rates of concussion                                                  |
|-------------------------|--------------------------------------------------------|----------------------------------------------------------------------------------------------------------------------------------|---------------|-----------------------------|-------------------------------------------------------------------------------------------------------------------------------------------------------------|
| (1998)                  | Summer: 2.51                                           | prevented a player from being available for selection for the next competition game.                                             |               |                             | injuries)<br>Summer: equal 5 <sup>th</sup> (1 / 20 total injuries)                                                                                          |
| Jennings et al (1997)   | Forwards: 11.1<br>Backs: 5.6<br>Total: 8.1             | The onset of pain or a disability that occurred while playing.                                                                   | Professional  | One club, four seasons      | Forward: 6 <sup>th</sup> (22 / 277 injuries)<br>Backs: 7 <sup>th</sup> (13 / 215 injuries)<br>Total: 6 <sup>th</sup> (35 / 492 injuries)                    |
| Stephenson et al (1996) | All players: 8<br>1 <sup>st</sup> team: 8<br>A team: 9 | The onset of pain or disability that occurred while playing rugby league football                                                | Professional  | Four seasons (249 games)    | All players: 8 <sup>th</sup> (35 / 492 injuries)<br>1 <sup>st</sup> team: 8 <sup>th</sup> (8 / 297 injuries)<br>A team: 7 <sup>th</sup> (17 / 195 injuries) |
| O'Connor (2011)         | NRL: 4.3<br>NYC: 3.3                                   | Any injury that was sustained during a first grade NRL game (or NYC game) or training session that resulted in missed game time. | Professional  | Sixteen clubs, one season   | NRL: 5 <sup>th</sup> ;<br>NYC: 7 <sup>th</sup>                                                                                                              |
| O'Connor (2012)         | NRL: 4.2<br>NYC: 3.4                                   | Any injury that was sustained during a first grade NRL game (or NYC game) or training session that resulted in missed game time. | Professional  | Sixteen clubs, one season   | NRL: Equal 5 <sup>th</sup><br>NYC: 5 <sup>th</sup>                                                                                                          |
| King (2006)             | Total: 14.7<br>u/16: 4.3<br>u/18: 18.5                 | Any pain or disability suffered by a player during a match that required advice and/or treatment                                 | Junior        | Four teams, one season      | Total: 6 <sup>th</sup> (5 / 74 total injuries)<br>u/16: equal 9 <sup>th</sup> (1 / 49 total injuries)<br>u/18: 2 <sup>nd</sup> (4 / 23 total injuries)      |

| Author (year)                                                                                                                                                                                                    | Concussion incidence                    | Injury Definition                                                                                | Level of Play     | Number of teams and seasons | Ranking of concussion frequency among all other injuries, rates of overall injury, and rates of concussion |
|------------------------------------------------------------------------------------------------------------------------------------------------------------------------------------------------------------------|-----------------------------------------|--------------------------------------------------------------------------------------------------|-------------------|-----------------------------|------------------------------------------------------------------------------------------------------------|
| King & Gabbett (2009)                                                                                                                                                                                            | NR, graphically represented, approx. 6. | Any pain or disability suffered by a player during a match that required advice and/or treatment | Semi-Professional | Eight teams, one season     | 7 <sup>th</sup>                                                                                            |
| <p>Note. Incidence reported as number of injuries per 1,000 playing (or training) hours; RR: risk ratio; Res: Reserve; NR: not reported; NYC: national youth competition; u/: under; approx.: approximately.</p> |                                         |                                                                                                  |                   |                             |                                                                                                            |
